# Supplementary material
Source: PubMed Central journal article supplement (PMC3623237)
Supplement: AEM.03824-12_zam999104229so1.pdf [file AEM.03824-12_zam999104229so1.pdf]

1 **Supplemental Material**

2

3 **Cloning of a Novel Nicotine Oxidase Gene from *Pseudomonas* sp. Strain HZN6 that**  
4 **Non-enantioselectively Degrades Nicotine to Pseudooxynicotine**

5

6 Jiguo Qiu,<sup>a,\*</sup> Yun Ma,<sup>b,\*</sup> Jing Zhang,<sup>a</sup> Yuezhong Wen,<sup>a</sup> and Weiping Liu<sup>a,\*\*</sup>

7

8 **Running title: A Novel Nicotine Oxidase Gene**

9

10 <sup>a</sup> *Key Laboratory of Environmental Remediation and Ecosystem Health, Ministry of Education,*  
11 *College of Environmental and Resource Sciences, Zhejiang University, Hangzhou 310058,*  
12 *China;*

13 <sup>b</sup> *Research Center of Environmental Science, College of Biological and Environmental*  
14 *Engineering, Zhejiang University of Technology, Hangzhou 310014, China*

15

16 \* These authors contributed equally to this article.

17

18 \*\* Corresponding author: Weiping Liu; E-mail: wliu@zju.edu.cn

19 Tel: (86)-571-88982740 Fax: (86)-571-88982341

20

21 **Keywords:** nicotine, pseudooxynicotine, enantiomers, non-selective degradation, nicotine

22 oxidase, *Pseudomonas* sp. HZN6

## 23 **PREDICTED METHODS**

### 24 **Construction of structural model of NOX**

25 To construct the tertiary structure of the NOX, the homology modeling was performed by the  
26 iterative threading assembly refinement (I-TASSER) server  
27 (<http://zhanglab.ccmb.med.umich.edu/I-TASSER/>) (1). The initial template was retrieved from  
28 the PDB library and identified by the LOMETS, a locally installed meta-threading approach. The  
29 following structure assembly, model selection, refinement, and structure-based functional  
30 annotation were performed with the reported protocols (2).

### 31 **Molecular Docking**

32 To predict the binding modes of *R*- and *S*-nicotine isomers to NOX, the program Molegro  
33 Virtual Docker (MVD, version 4.2.0) were used. The binding pocket was defined as a sphere with  
34 a user-defined origin and a radius of 15 Å. Twenty times of the MolDock SE algorithm runs were  
35 carried out, and the energetic evaluation of the complexes was performed with the MolDock  
36 Score. Ten poses of each molecular docking process were finally generated.

37

## 38 **PREDICTED RESULTS AND DISCUSSION**

39 The tertiary structure for the NOX protein was generated by the I-TASSER software (Fig.  
40 S1). The predicted structure showed most structural similarity to the 6-hydroxy-L-nicotine  
41 oxidase of *Arthrobacter nicotinovorans*. As shown in Fig. S1, the NOX consists of three distinct  
42 domains: the FD (putative FAD-binding domain), the S1 (putative substrate-binding domain 1),  
43 and the S2 (putative substrate-binding domain 2). The conserved FAD-binding motif GxGxxG

44 existing in many flavoproteins was observed in the FD domain of NOX (GGGFAG), which  
45 suggested a similar mechanism of cofactor binding. Furthermore, two putative substrate-binding  
46 cavities were identified (Fig. S2). One cavity (C1) was proposed for the binding of FAD, and the  
47 other (C2) was for nicotine.

48 To improve the understanding of the interaction between the NOX and the nicotine isomers,  
49 both *R*- and *S*-nicotine were separately docked into the C2 cavity. As shown in Fig S3, it is  
50 important to note that both enantiomers shared the same binding mode with the NOX, and  
51 located in almost mirror symmetry. The N1 of both nicotine enantiomers formed the hydrogen  
52 bond with the His456. The results agreed with the experimental findings that the *Pseudomonas* sp.  
53 strain HZN6 degrades the racemic mixture of nicotine. The docking results of both *R*- and  
54 *S*-nicotine in the predicted tertiary structure of the NOX protein might provide a reasonable clue  
55 of the the non-enantioselective degradation. The FAD was proposed to be a cofactor of the NOX.  
56 The conserved FAD-binding GxGxxG motif was found in the NOX sequence and the model  
57 docking results also showed that the FAD has formed strong hydrogen bond with this motif (Fig.  
58 S4).

59 However, the homology of NOX to known proteins (including those whose structures have  
60 been solved) is rather low (about 30% identity). The reliability of homology model is also low.  
61 To obtain the actual structure and the mechanism of the nicotine degradation by the NOX, the  
62 protein should be overexpressed in a suitable host strain and subsequently purified and  
63 crystallized.

64 Table S1. EFs changes during the degradation of *RS*-nicotine by *Pseudomonas* sp. strain HZN6  
65 and transconjugant KT-nox. A, at the beginning of the reaction, no substrate was degraded. B and  
66 C, at the points when approximately 60 and 85% of the substrate were degraded, respectively.

67

| EFs of nicotine |                   |                   |
|-----------------|-------------------|-------------------|
| Time            | HZN6              | KT-nox            |
| A               | $0.496 \pm 0.004$ | $0.495 \pm 0.002$ |
| B               | $0.502 \pm 0.003$ | $0.493 \pm 0.004$ |
| C               | $0.499 \pm 0.003$ | $0.502 \pm 0.004$ |

68 Fig. S1 Tertiary structure of NOX generated by homology modeling. FD, putative FAD-binding  
69 domain (yellow); S1, putative substrate-binding domain 1 (violet) and S2 putative  
70 substrate-binding domain 2 (cyan); the conserved GGGFAG motif (red). N, N-termination; C,  
71 C-termination.

72

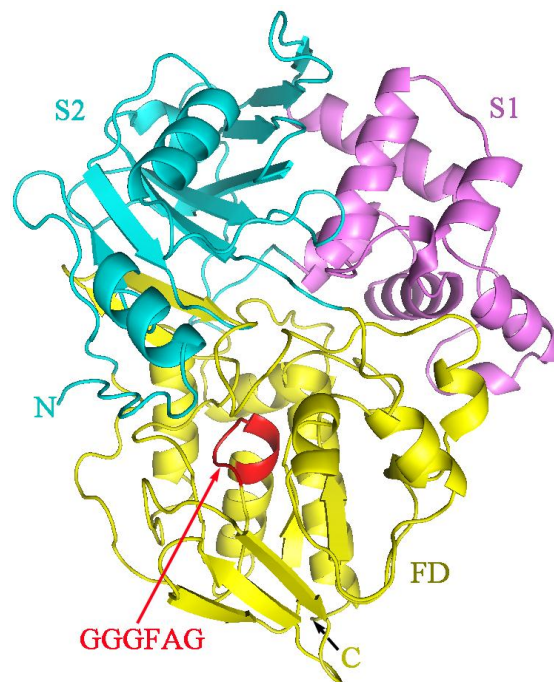

73

74 Fig. S2 Tertiary structure of NOX generated by homology modelling and two putative  
75 substrate-binding cavities C1 and C2 (green). FD, putative FAD-binding domain; S1, putative  
76 substrate-bonding domain 1; S2 putative substrate-bonding domain 2. The  $\alpha$ -helix,  $\beta$ -sheet and  
77 loop were shown in red, blue and white color, respectively.

78

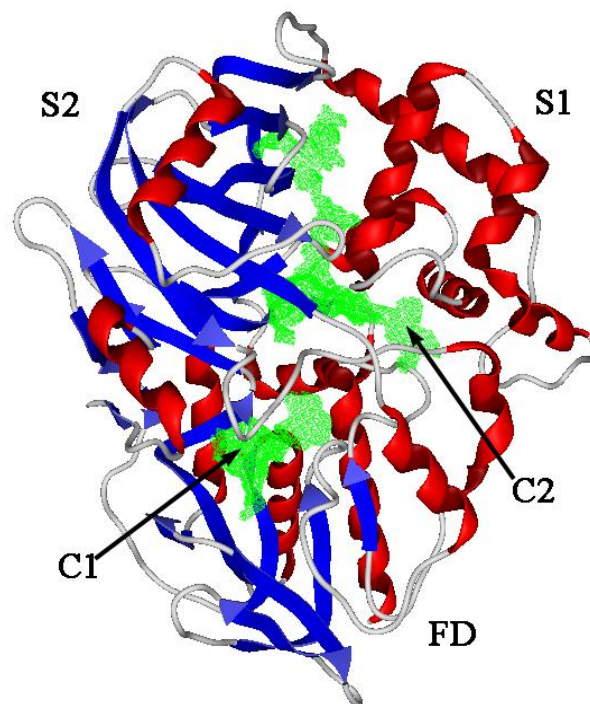

79

80 Fig. S3 The best docked conformation of *R*-nicotine (yellow) and *S*-nicotine (green) in NOX. The  
81 hydrogen bond was showed by cyan broken line.

82

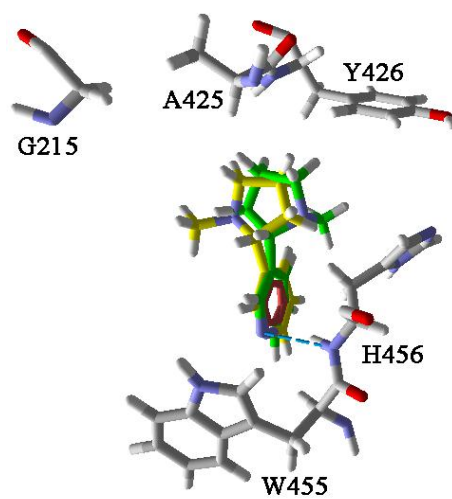

83

84 Fig. S4 Two configurations of FAD docked in NOX C1 cavity and hydrogen bonds with the motif  
85 GGGFAG. The hydrogen bonds were showed by cyan broken line.

86

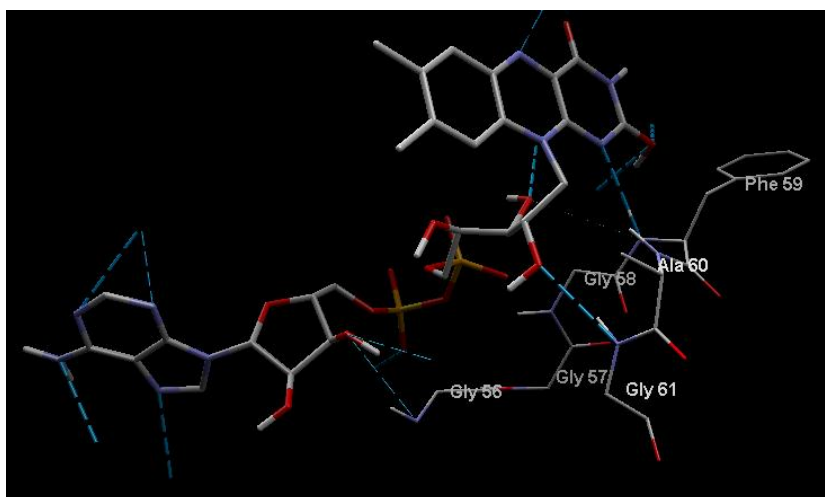

87

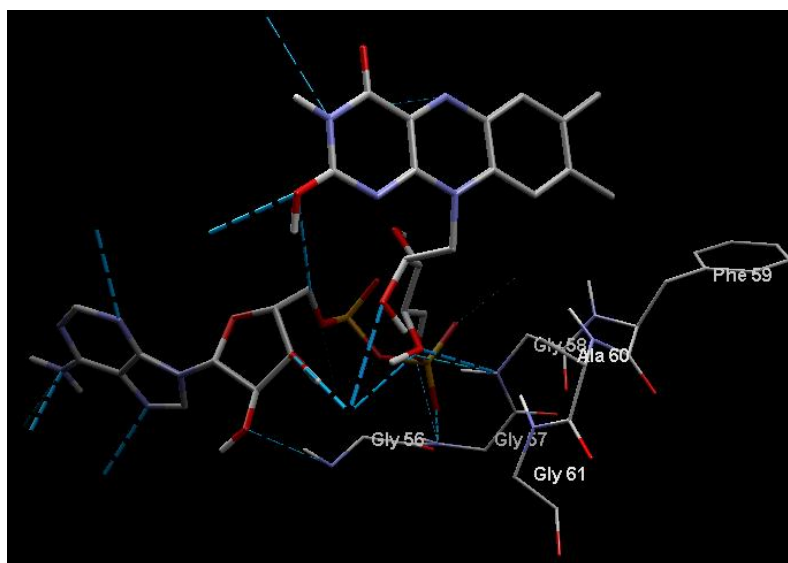

88



89 **REFERENCES**

90

- 91 1. Zhang Y. 2008. I-TASSER server for protein 3D structure prediction. *BMC Bioinf.* 9:40.
- 92 2. Roy A, Kucukural A, Zhang Y. 2010. I-TASSER: a unified platform for automated  
93 protein structure and function prediction. *Nat. Protoc.* 5:725-738.

94
